# Supplementary material for: Preliminary Design of a Self-Sufficient Electrical Storage System Based on Electrolytic Hydrogen for Power Supply in a Residential Application
Source: MDPI journal article supplement (doi:10.3390/app11209582), 2021-10-14
Supplement: s1 [file s1]

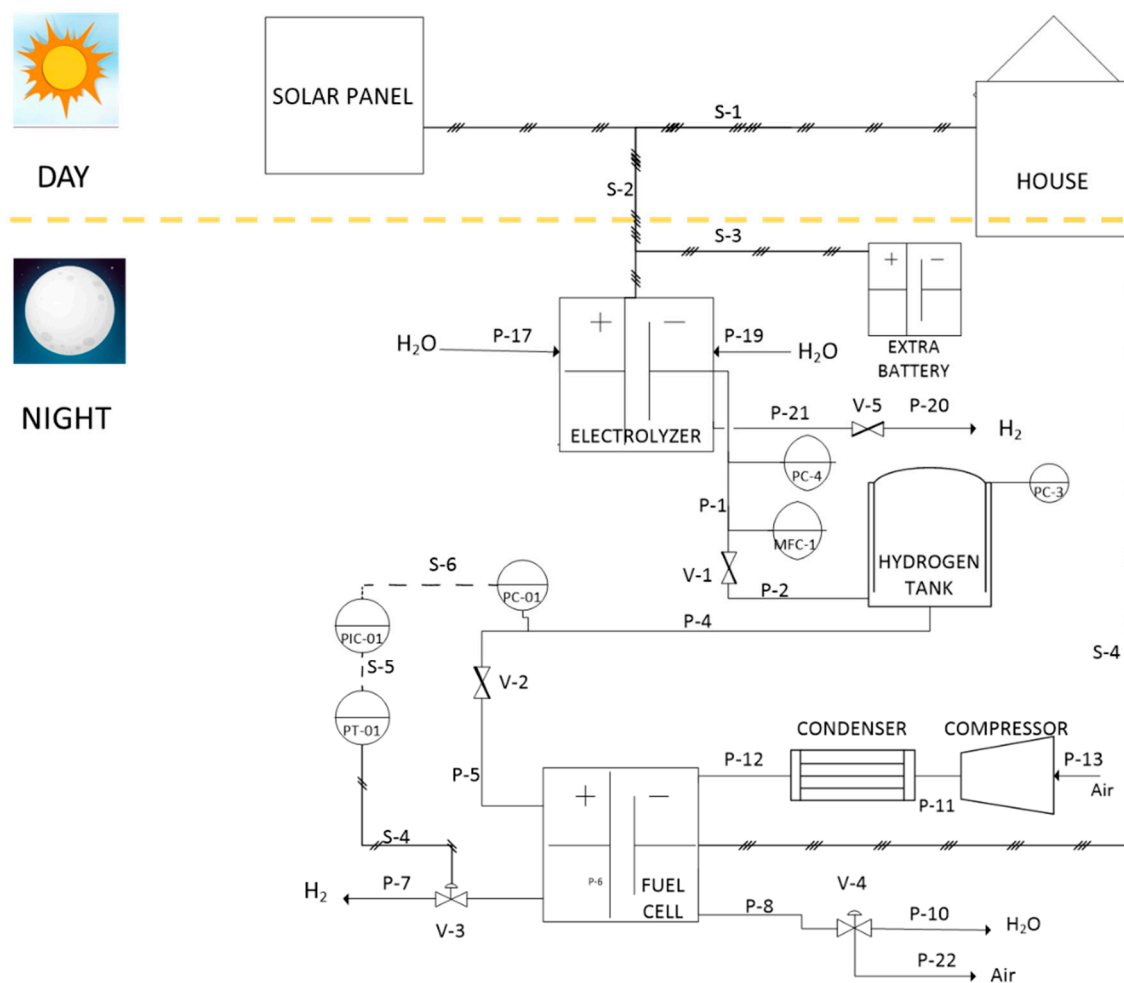

**Figure S1. P&ID.**

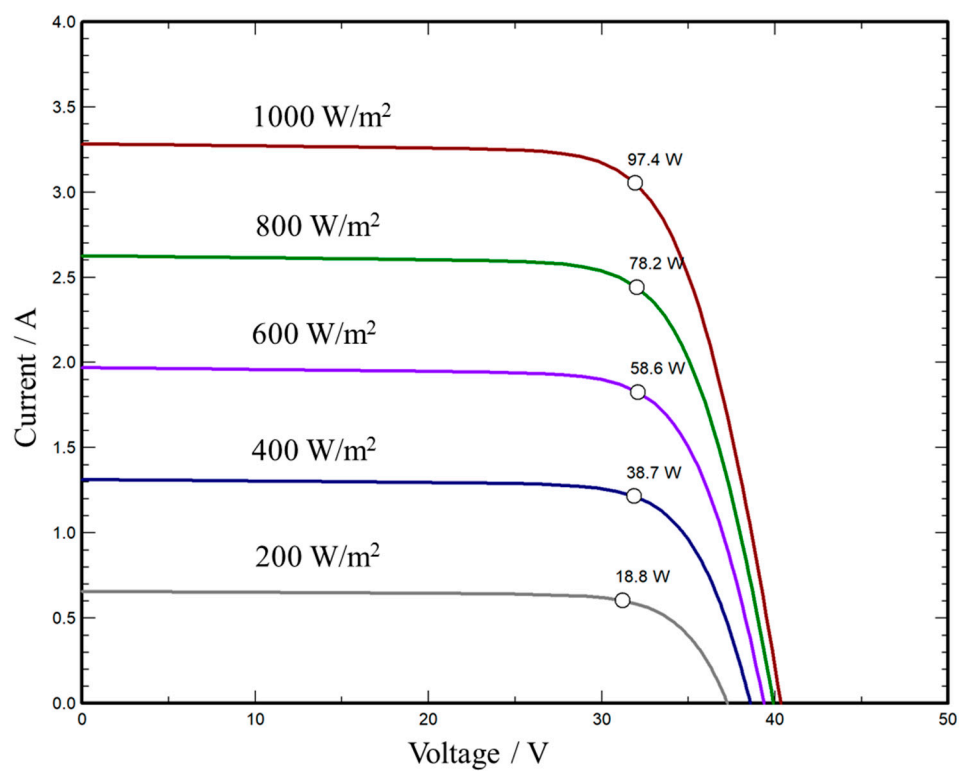

**Figure S2.** I-V characteristic curves of Solartec SST72 110 24 106W module

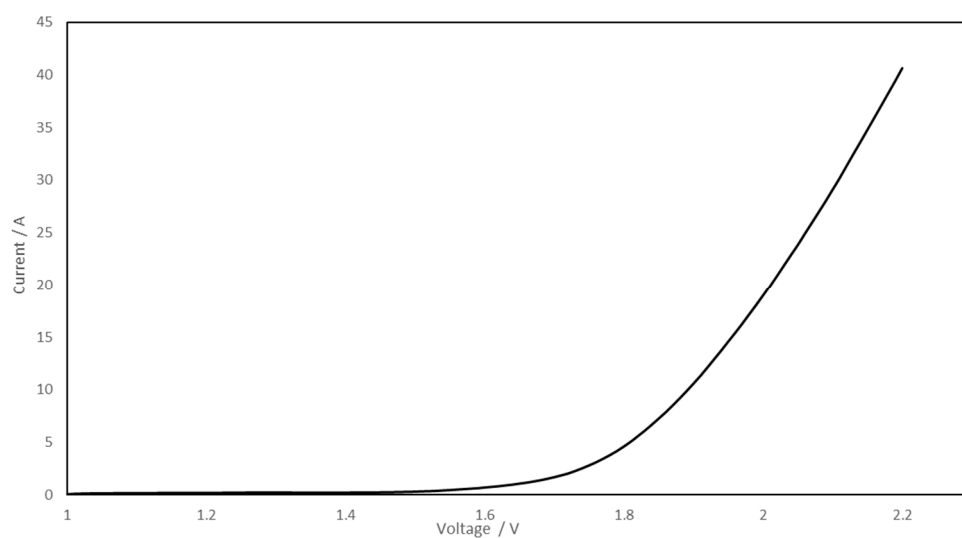

**Figure S3.** I-V curve of the experimental AEMWE of  $50 \text{ cm}^2$ .

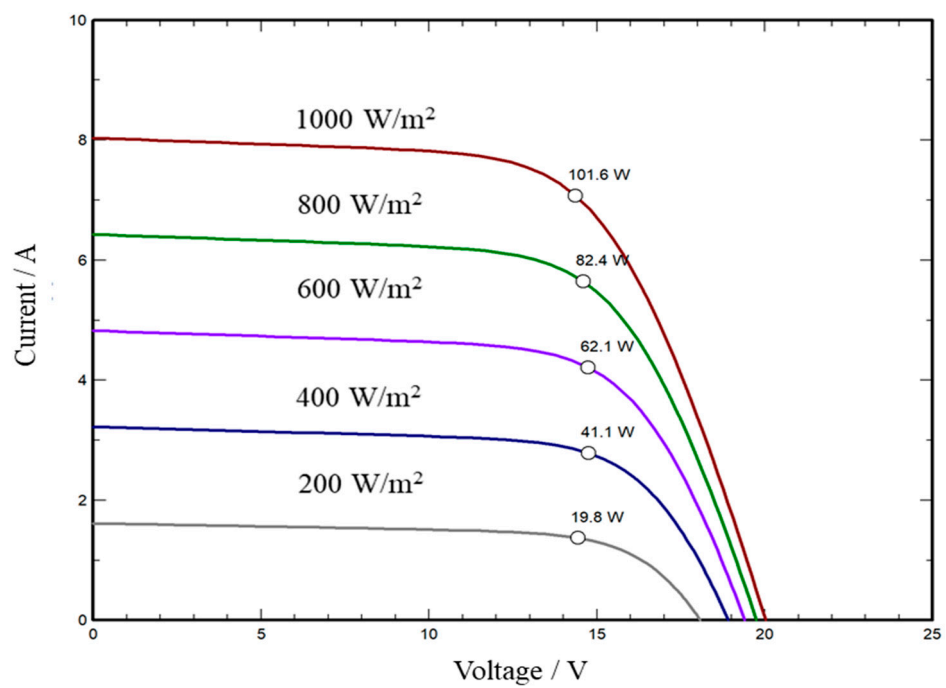

**Figure S4.** I-V characteristic curves of Solartec SSW72 08 108Wp module.

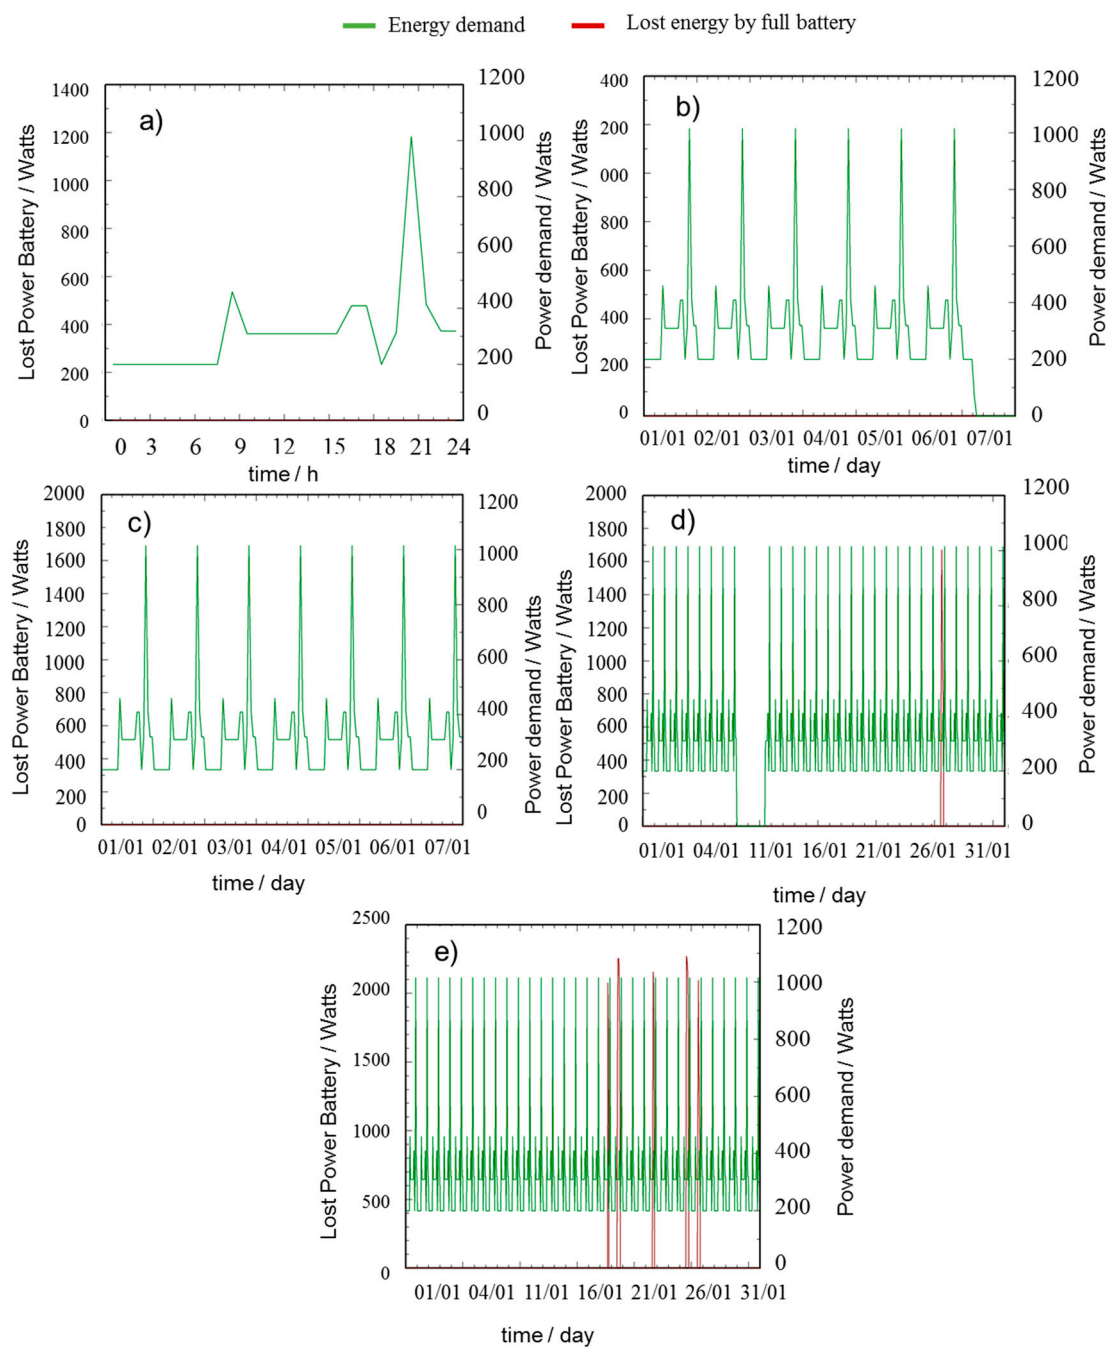

**Figure S5.** January supplied electrical demand by a) three PV string for the 1<sup>st</sup> b) three PV string for the first week c) four PV string for the first week d) four PV string for the full month e) five PV string for the full month.

|                                              |                                                |                             |
|----------------------------------------------|------------------------------------------------|-----------------------------|
| Type                                         | PEM (Proton Exchange Membrane) fuel cell stack |                             |
| Typical Performance: <sup>1</sup>            | Rated Power                                    | 41.1 W/cell                 |
|                                              | Rated current                                  | 65.3 Amps                   |
|                                              | DC voltage                                     | 660 mV/cell                 |
| Fuel                                         | Hydrogen                                       | 99.95% or better            |
|                                              | Fuel supply pressure                           | 0.16 to 0.56 bar g          |
|                                              | Fuel flow rate                                 | ~0.5 slpm/cell <sup>2</sup> |
| Oxidant/Coolant                              | Coolant                                        | Air                         |
|                                              | Coolant flow rate                              | ~50 slpm/cell <sup>2</sup>  |
| Temperatures                                 | Operating temperature                          | -40°C to 52°C               |
|                                              | Start up temperature                           | ≥-10°C to 52°C              |
| Physical Characteristics:<br>(56-cell stack) | Length x width x height                        | 363 x 103 x 351 mm          |
|                                              | Mass                                           | 11.0 kg                     |
| Product Certification                        | CAN/CSA-C22.2 No. 62282-2 Fuel Cell Modules    |                             |

**Figure S6.** Datasheet of Fcgen-1020ACS fuel-cell.

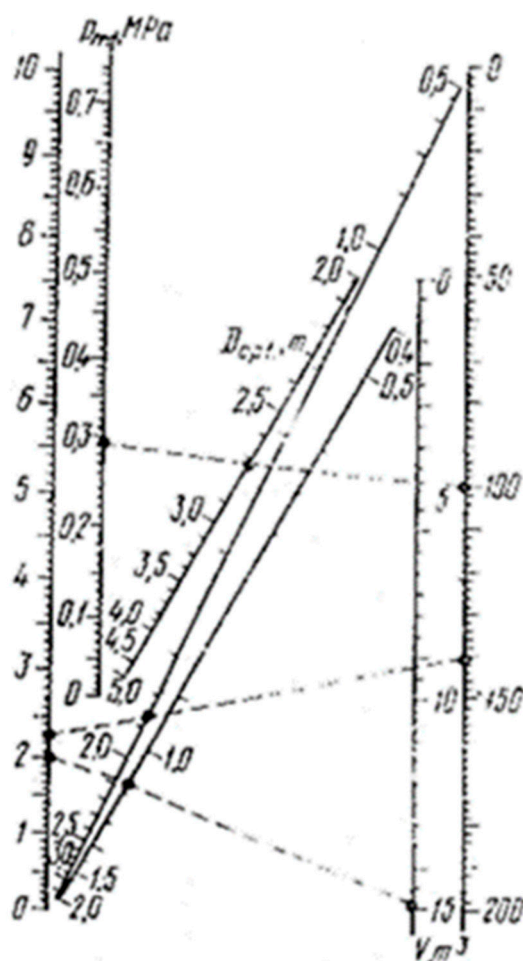

**Figure S7.** Mijalev monogram.

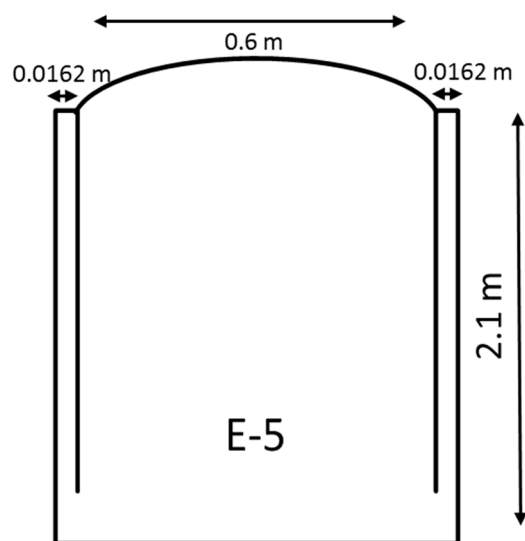

**Figure S8.** Hydrogen tank with dimensions.

**Table S1.** Output photovoltaic panel energy and electrolyzer energy.

| <b><math>t</math><br/>(days)</b> | <b><math>E_{o,PV90m}</math><br/>(KWh/day)</b> | <b><math>E_{i,EL}</math><br/>(kWh/day)</b> | <b><math>E_{o,PV1m}</math><br/>(kWh/day)</b> |
|----------------------------------|-----------------------------------------------|--------------------------------------------|----------------------------------------------|
| 1                                | 42.000                                        | 17.314                                     | 0.4667                                       |
| 2                                | 20.430                                        | 0.000                                      | 0.2270                                       |
| 3                                | 13.839                                        | 0.000                                      | 0.1538                                       |
| 4                                | 21.063                                        | 0.000                                      | 0.2340                                       |
| 5                                | 40.950                                        | 16.362                                     | 0.4550                                       |
| 6                                | 19.794                                        | 0.000                                      | 0.2199                                       |
| 7                                | 5.091                                         | 0.000                                      | 0.0566                                       |
| 8                                | 17.370                                        | 0.000                                      | 0.1930                                       |
| 9                                | 22.584                                        | 0.000                                      | 0.2509                                       |
| 10                               | 14.814                                        | 0.000                                      | 0.1646                                       |
| 11                               | 14.649                                        | 0.000                                      | 0.1628                                       |
| 12                               | 47.340                                        | 22.155                                     | 0.5260                                       |
| 13                               | 49.530                                        | 24.141                                     | 0.5503                                       |
| 14                               | 14.394                                        | 0.000                                      | 0.1599                                       |
| 15                               | 31.500                                        | 7.793                                      | 0.3500                                       |
| 16                               | 30.420                                        | 6.814                                      | 0.3380                                       |
| 17                               | 55.590                                        | 29.636                                     | 0.6177                                       |
| 18                               | 18.705                                        | 0.000                                      | 0.2078                                       |
| 19                               | 26.073                                        | 2.872                                      | 0.2897                                       |
| 20                               | 10.791                                        | 0.000                                      | 0.1199                                       |
| 21                               | 34.350                                        | 10.377                                     | 0.3817                                       |
| 22                               | 30.210                                        | 6.623                                      | 0.3357                                       |
| 23                               | 16.740                                        | 0.000                                      | 0.1860                                       |
| 24                               | 34.350                                        | 10.377                                     | 0.3817                                       |
| 25                               | 22.671                                        | 0.000                                      | 0.2519                                       |
| 26                               | 25.587                                        | 2.432                                      | 0.2843                                       |
| 27                               | 4.305                                         | 0.000                                      | 0.0478                                       |
| 28                               | 4.071                                         | 0.000                                      | 0.0452                                       |
| 29                               | 4.779                                         | 0.000                                      | 0.0531                                       |
| 30                               | 53.550                                        | 27.786                                     | 0.5950                                       |
| 31                               | 60.720                                        | 34.287                                     | 0.6747                                       |

**Table S2.** Hydrogen initial conditions.

|                         |            |
|-------------------------|------------|
| P (Pa)                  | 3000000    |
| P <sub>c</sub> (Pa)     | 1317225    |
| T (K)                   | 298        |
| T <sub>c</sub> (K)      | 32.82      |
| R <sub>u</sub> (J/molK) | 8.3143     |
| a                       | 0.02385    |
| b                       | 0.00002589 |
| n (mol)                 | 900        |

**Table S3.** Vian Method.

| INVESTMENT | DEFINATION                     | RANGE       |
|------------|--------------------------------|-------------|
| I1         | Installation Costs             | X           |
| I2         | Operation and Maintenance Cost | 0.02 X      |
| I3         | Pipe and Valve                 | 0.6 X       |
| I4         | Control Instruments            | 0.5-0.3 X   |
| I5         | Calorific Insulation           | 0.03-0.1 X  |
| I6         | Electrical Installation        | 0.1-0.2 X   |
| I7         | Land and Building              | 0.12-0.15 X |
| I8         | Auxiliary Installations        | 0.25-0.7 X  |
| Y          | Physical Capital               | ΣI          |
| I9         | Project Fees                   | 0.2-0.3 Y   |
| Z          | Direct Capital                 | I9 + Y      |
| I10        | Work Contract                  | 0.04-0.1 Z  |
| I11        | Incidentals                    | 0.1-0.3 Z   |
| TOTAL      |                                | Z+I10+ I11  |



**Table S4.** Economical Evaluation of both systems: conventional system with battery and electrolyzer-fuel cell system without battery.

| SYSTEM  | Year         | 0      | 1      | 2      | 3      | 4     | 5     | 6     | 7     | 8     | 9     | 10    | 11    | 12     | 13     | 14     | 15     | 16     | 17     | 18     | 19   | 20   |
|---------|--------------|--------|--------|--------|--------|-------|-------|-------|-------|-------|-------|-------|-------|--------|--------|--------|--------|--------|--------|--------|------|------|
| EL-FC   | FCI          | -14366 |        |        |        |       |       |       |       |       |       |       |       |        |        |        |        |        |        |        |      |      |
|         | WCI          | -1437  |        |        |        |       |       |       |       |       |       |       |       |        |        |        |        |        |        |        |      |      |
|         | IF           | -15803 |        |        |        |       |       |       |       |       |       |       |       |        |        |        |        |        |        |        |      |      |
|         | Amortization |        | 718    | 718    | 718    | 718   | 718   | 718   | 718   | 718   | 718   | 718   | 718   | 718    | 718    | 718    | 718    | 718    | 718    | 718    | 718  | 718  |
|         | Benefits     |        | 1215   | 1215   | 1215   | 1215  | 1215  | 1215  | 1215  | 1215  | 1215  | 1215  | 1215  | 1215   | 1215   | 1215   | 1215   | 1215   | 1215   | 1215   | 1215 | 1215 |
|         | CF(€)        |        | 1934   | 1934   | 1934   | 1934  | 1934  | 1934  | 1934  | 1934  | 1934  | 1934  | 1934  | 1934   | 1934   | 1934   | 1934   | 1934   | 1934   | 1934   | 1934 | 1934 |
|         | C(€)         | -15803 | 1934   | 1934   | 1934   | 1934  | 1934  | 1934  | 1934  | 1934  | 1934  | 1934  | 1934  | 1934   | 1934   | 1934   | 1934   | 1934   | 1934   | 1934   | 1934 | 1934 |
|         | NPV(€)       | -15803 | -14045 | -12447 | -10994 | -9673 | -8472 | -7381 | -6389 | -5487 | -4666 | -3921 | -3243 | -2627  | -2067  | -1558  | -1095  | -674   | -292   | 56     | 372  | 660  |
| BATTERY | FCI          | -12135 |        |        |        |       |       |       |       |       |       |       |       |        |        |        |        |        |        |        |      |      |
|         | WCI          | -1213  |        |        |        |       |       |       |       |       |       |       |       |        |        |        |        |        |        |        |      |      |
|         | IF           | -13348 |        |        |        |       |       |       |       |       |       |       |       |        |        |        |        |        |        |        |      |      |
|         | Amortization |        | 607    | 607    | 607    | 607   | 607   | 607   | 607   | 607   | 607   | 607   | 607   | 607    | 607    | 607    | 607    | 607    | 607    | 607    | 607  | 607  |
|         | Benefits (€) |        | 1215   | 1215   | 1215   | 1215  | 1215  | 1215  | 1215  | 1215  | 1215  | 1215  | 1215  | 1215   | 1215   | 1215   | 1215   | 1215   | 1215   | 1215   | 1215 | 1215 |
|         | CF(€)        | -13348 | 1822   | 1822   | 1822   | 1822  | 1822  | 1822  | 1822  | 1822  | 1822  | 1822  | 1822  | 1822   | 1822   | 1822   | 1822   | 1822   | 1822   | 1822   | 1822 | 1822 |
|         | C(€)         | -13348 | 1822   | 1822   | 1822   | 1822  | 1822  | 1822  | 1822  | 1822  | 1822  | 1822  | 1822  | 1822   | 1822   | 1822   | 1822   | 1822   | 1822   | 1822   | 1822 | 1822 |
|         | NPV(€)       | -13348 | -11692 | -10186 | -8817  | -7573 | -6441 | -5413 | -4478 | -3628 | -2855 | -2152 | -1514 | -933.1 | -405.3 | 74.515 | 510.72 | 907.26 | 1267.8 | 1595.5 | 1893 | 2164 |
